# Supplementary material
Source: publisher figshare collection journal article supplement (https://rs.figshare.com/ndownloader/files/28924049)
Supplement: Supplementary file 1 [file 28924049]

### INDIVIDUAL LEVEL ANALYSES ###
#Testing predictions:
#i) given tolerance predicts vocal rate
#ii) received tolerance predicts vocal rate
#iii) feeding proximity predicts vocal rate
setwd("/Users/eithnekavanagh/Desktop/PhD/Vocal Rate proc b stuff/Royal Society Open Science/DATA")

# load the packages
library("MCMCglmm")
library("caper")
library("car")
library("MASS")

#load data
ind_data<-read.csv("Individual_Level_Data.csv", header=T)


####Prediction i) Given Tolerance: DV = vocal rate, Random effects = Group + Species, Fixed Effects = Given Tolerance versions of Aggression DII, Counteraggression, Aggression Intensity, and Group Size
##prepare data: creates dataset with only complete cases of all variables.
Given_data<-ind_data[complete.cases(ind_data$Vocal_Rate, ind_data$Group_Size, ind_data$Given_Counteraggression, ind_data$Given_Intensity, ind_data$Given_Agg_DII),]
str(Given_data) #now saying 181 observations with complete data for all variables. 


##Running the full model
#We decided to run the model using a Gaussian distribution with log10 transformation on the DV
# create new priors including two random effects:
gauss_priors2<-list(G=list(G1=list(V=1, nu=0.002), G2=list(V=1, nu=0.002)), R=list(V=1, nu=0.002)) 
# run the model:
given_model<-MCMCglmm(log10(Vocal_Rate+1) ~ Given_Agg_DII + Given_Intensity + Given_Counteraggression + Group_Size, random=~Species+Group, data= Given_data, prior= gauss_priors2, verbose=TRUE, nitt=501000, burnin=1000, thin=100) 
#Summary of model; shows good effective sample size, and low pMCMC value for Aggression DII: 
summary(given_model) #Note that slightly different values will emerge each time the model is run
#Checking VIF for fixed effects: all between 1-1.3
vif(VIFmodel<-glm(given_model $Fixed$formula, na.action=na.omit, data=Given_data)) # 
#Checking MCMC plots for fixed effects and residaul variance: 
plot(given_model) # 
# Checking proportion of residual variance explained by group:
mean(given_model $VCV[,"Group"]/((given_model$VCV[,"Species"]+ given_model$VCV[,"Group"]+ given_model$VCV[,"units"])))
# Checking proportion of residual variance explained by species:
mean(given_model$VCV[,"Species"]/((given_model$VCV[,"Species"]+ given_model$VCV[,"Group"]+ given_model$VCV[,"units"]))) #.44
#Checking R-squared:
cor.test(predict(given_model), log10(Given_data$Vocal_Rate+1))$estimate^2 # 
#Checking diagnostic plots:
#Plotting distribution of residuals with histogram and qqp: look acceptable (not perfect)
hist(log10(Given_data $Vocal_Rate+1)-predict(given_model)) 
qqp(log10(Given_data $Vocal_Rate+1)-predict(given_model)) 
#Plotting data against predicted values: look fine: 
plot(log10(Given_data $Vocal_Rate+1)-predict(given_model), predict(given_model)) # this looks not too bad I think.


##Now running model with just Aggression DII as given tolerance fixed effect (also with Group size as fixed effect, Group and Species as random effects and vocal rate as DV)
# preparing data: creates dataset with only complete cases of all variables in model
givenagg_data<-ind_data[complete.cases(ind_data$Vocal_Rate, ind_data$Group_Size, ind_data$Given_Agg_DII),]
str(givenagg_data) #Shows 253 cases remaining
# run the model with log10 on DV:
givenagg_model<-MCMCglmm(log10(Vocal_Rate+1) ~ Given_Agg_DII+ Group_Size, random=~Species+Group, data= givenagg_data, prior= gauss_priors2, verbose=TRUE, nitt=501000, burnin=1000, thin=100) 
#Summary of model; shows good effective sample size, and low pMCMC value for Aggression DII: 
summary(givenagg_model) #Note that slightly different values will emerge each time the model is run
#Checking MCMC plots for fixed effects and residual variance: 
plot(givenagg_model) 
# Checking proportion of residual variance explained by group:
mean(givenagg_model $VCV[,"Group"]/((givenagg_model$VCV[,"Species"]+ givenagg_model$VCV[,"Group"]+ givenagg_model$VCV[,"units"])))
# Checking proportion of residual variance explained by species:
mean(givenagg_model$VCV[,"Species"]/((givenagg_model$VCV[,"Species"]+ givenagg_model$VCV[,"Group"]+ givenagg_model$VCV[,"units"]))) #.44
#Checking R-squared:
cor.test(predict(givenagg_model), log10(givenagg_data$Vocal_Rate+1))$estimate^2 # 
#Checking diagnostic plots:
#Plotting distribution of residuals with histogram and qqp: look acceptable (not perfect)
hist(log10(givenagg_data $Vocal_Rate+1)-predict(givenagg_model)) 
qqp(log10(givenagg_data $Vocal_Rate+1)-predict(givenagg_model)) 
#Plotting data against predicted values: look fine: 
plot(log10(givenagg_data $Vocal_Rate+1)-predict(givenagg_model), predict(givenagg_model)) # this looks not too bad I think.

##Supplementary additional model; given Groom DII and group size as predictors
givengroom_data<-ind_data[complete.cases(ind_data$Vocal_Rate, ind_data$Group_Size, ind_data$Given_Groom_DII),]
str(givengroom_data) #Shows 304 cases remaining
# run the model with log10 on DV:
givengroom_model<-MCMCglmm(log10(Vocal_Rate+1) ~ Given_Groom_DII+ Group_Size, random=~Species+Group, data= givengroom_data, prior= gauss_priors2, verbose=TRUE, nitt=501000, burnin=1000, thin=100) 
#Summary of model; shows good effective sample size, and low pMCMC value for Groom DII: 
summary(givengroom_model) #Note that slightly different values will emerge each time the model is run
#Checking MCMC plots for fixed effects and residual variance: 
plot(givengroom_model) 
#Checking diagnostic plots:
#Plotting distribution of residuals with histogram and qqp: look acceptable (not perfect)
hist(log10(givengroom_data $Vocal_Rate+1)-predict(givengroom_model)) 
qqp(log10(givengroom_data $Vocal_Rate+1)-predict(givengroom_model)) 
#Plotting data against predicted values: look fine: 
plot(log10(givengroom_data $Vocal_Rate+1)-predict(givengroom_model), predict(givengroom_model)) # this looks not too bad I think.


####Prediction ii) Received Tolerance: DV = vocal rate, Random effects = Group + Species, Fixed Effects = Received Tolerance versions of Aggression DII, Counteraggression, Aggression Intensity, and Group Size
##prepare data: creates dataset with only complete cases of all variables.
Received_data<-ind_data[complete.cases(ind_data$Vocal_Rate, ind_data$Group_Size, ind_data$Received_Counteraggression, ind_data$Received_Intensity, ind_data$Received_Agg_DII),]
str(Received_data) #shows there are 178 observations with complete data for all variables. 


##Running the model
#We decided to run the model using a Gaussian distribution with log10 transformation on the DV
# create new priors including two random effects:
gauss_priors2<-list(G=list(G1=list(V=1, nu=0.002), G2=list(V=1, nu=0.002)), R=list(V=1, nu=0.002)) 
# run the model:
Received_model<-MCMCglmm(log10(Vocal_Rate+1) ~  Received_Agg_DII + Received_Intensity + Received_Counteraggression + Group_Size, random=~Species+Group, data= Received_data, prior= gauss_priors2, verbose=TRUE, nitt=501000, burnin=1000, thin=100) 
#Summary of model; shows good effective sample size, and no low pMCMC values
summary(Received_model) #Note that slightly different values will emerge each time the model is run
#Checking VIF for fixed effects: all between 1-1.3
vif(VIFmodel<-glm(Received_model $Fixed$formula, na.action=na.omit, data=Received_data)) # 
#Checking MCMC plots for fixed effects and residaul variance: 
plot(Received_model) # 
# Checking proportion of residual variance explained by group:
mean(Received_model $VCV[,"Group"]/((Received_model$VCV[,"Species"]+ Received_model$VCV[,"Group"]+ Received_model$VCV[,"units"])))
# Checking proportion of residual variance explained by species:
mean(Received_model$VCV[,"Species"]/((Received_model$VCV[,"Species"]+ Received_model$VCV[,"Group"]+ Received_model$VCV[,"units"]))) #.44
#Checking R-squared:
cor.test(predict(Received_model), log10(Received_data$Vocal_Rate+1))$estimate^2 # 
#Checking diagnostic plots:
#Plotting distribution of residuals with histogram and qqp: look acceptable (not perfect)
hist(log10(Received_data $Vocal_Rate+1)-predict(Received_model)) 
qqp(log10(Received_data $Vocal_Rate+1)-predict(Received_model)) 
#Plotting data against predicted values: look fine: 
plot(log10(Received_data $Vocal_Rate+1)-predict(Received_model), predict(Received_model)) # this looks not too bad I think.

##Supplementary additional model; received Groom DII and group size as predictors
receivedgroom_data<-ind_data[complete.cases(ind_data$Vocal_Rate, ind_data$Group_Size, ind_data$Received_Groom_DII),]
str(receivedgroom_data) #Shows 285 cases remaining
# run the model with log10 on DV:
receivedgroom_model<-MCMCglmm(log10(Vocal_Rate+1) ~ Received_Groom_DII+ Group_Size, random=~Species+Group, data= receivedgroom_data, prior= gauss_priors2, verbose=TRUE, nitt=501000, burnin=1000, thin=100) 
#Summary of model; shows good effective sample size, and low pMCMC value for Groom DII: 
summary(receivedgroom_model) #Note that slightly different values will emerge each time the model is run
#Checking MCMC plots for fixed effects and residual variance: 
plot(receivedgroom_model) 
#Checking diagnostic plots:
#Plotting distribution of residuals with histogram and qqp: look acceptable (not perfect)
hist(log10(receivedgroom_data $Vocal_Rate+1)-predict(receivedgroom_model)) 
qqp(log10(receivedgroom_data $Vocal_Rate+1)-predict(receivedgroom_model)) 
#Plotting data against predicted values: look fine: 
plot(log10(receivedgroom_data $Vocal_Rate+1)-predict(receivedgroom_model), predict(receivedgroom_model)) # this looks not too bad I think.


####Prediction iii) Feeding Proximity: DV = vocal rate, Random effects = Group + Species, Fixed Effects = Feeding Proximity and Group Size
##prepare data: creates dataset with only complete cases of all variables.
Feed_data<-ind_data[complete.cases(ind_data$Vocal_Rate, ind_data$Group_Size, ind_data$Feeding_Proximity),]
str(Feed_data) #shows there are 232 observations with complete data for all variables. 

##Running the model
#We decided to run the model using a Gaussian distribution with log10 transformation on the DV
# create new priors including two random effects:
gauss_priors2<-list(G=list(G1=list(V=1, nu=0.002), G2=list(V=1, nu=0.002)), R=list(V=1, nu=0.002)) 
# run the model:
Feed_model<-MCMCglmm(log10(Vocal_Rate+1) ~ Feeding_Proximity + Group_Size, random=~Species+Group, data= Feed_data, prior= gauss_priors2, verbose=TRUE, nitt=501000, burnin=1000, thin=100) 
#Summary of model; shows good effective sample size, and no low pMCMC values
summary(Feed_model) #Note that slightly different values will emerge each time the model is run
#Checking VIF for fixed effects: all between 1-1.3
vif(VIFmodel<-glm(Feed_model $Fixed$formula, na.action=na.omit, data=Feed_data)) # 
#Checking MCMC plots for fixed effects and residaul variance: 
plot(Feed_model) # 
# Checking proportion of residual variance explained by group:
mean(Feed_model $VCV[,"Group"]/((Feed_model$VCV[,"Species"]+ Feed_model$VCV[,"Group"]+ Feed_model$VCV[,"units"])))
# Checking proportion of residual variance explained by species:
mean(Feed_model$VCV[,"Species"]/((Feed_model$VCV[,"Species"]+ Feed_model$VCV[,"Group"]+ Feed_model$VCV[,"units"]))) #.44
#Checking R-squared:
cor.test(predict(Feed_model), log10(Feed_data$Vocal_Rate+1))$estimate^2 # 
#Checking diagnostic plots:
#Plotting distribution of residuals with histogram and qqp (Not perfect)
hist(log10(Feed_data $Vocal_Rate+1)-predict(Feed_model)) 
qqp(log10(Feed_data $Vocal_Rate+1)-predict(Feed_model)) 
#Plotting data against predicted values (Bit odd looking but no funneling)
plot(log10(Feed_data $Vocal_Rate+1)-predict(Feed_model), predict(Feed_model)) # this looks not too bad I think.
